# Supplementary material
Source: Springer Nature journal article supplement (https://www.springermedizin.de/resource/supplementary/12969_2012_965_MOESM2_ESM.pdf/9589198)

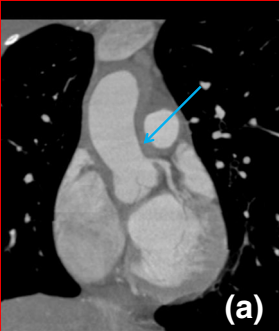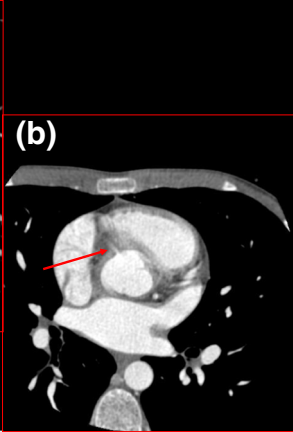

Supplement: MOESM2 [file 9589198]
